# Supplementary material for: The Effect of Hexamethylene Diisocyanate-Modified Graphene Oxide as a Nanofiller Material on the Properties of Conductive Polyaniline
Source: PubMed Central journal article supplement (PMC6630901; doi:10.3390/polym11061032), 2019-06-11
Supplement: polymers-11-01032-s001.pdf [file polymers-11-01032-s001.pdf]

## Supplementary Materials

# The Effect of Hexamethylene Diisocyanate-Modified Graphene Oxide as a Nanofiller Material on the Properties of Conductive Polyaniline

José Antonio Luceño Sánchez<sup>1</sup>, Ana Maria Díez-Pascual<sup>1\*</sup>, Rafael Peña Capilla<sup>2</sup> and Pilar García Díaz<sup>2</sup>

<sup>1</sup> Department of Analytical Chemistry, Physical Chemistry and Chemical Engineering, Faculty of Sciences, Alcalá University, 28805 Madrid, Spain; jose.luceno@uah.es

<sup>2</sup> Department of Signal Theory and Communication. Polytechnic High School, Alcalá University, 28805 Madrid, Spain; rafa.pena@uah.es, pilar.garcia@uah.es

\*Correspondence: am.diez@uah.es; Tel.: +34-918-856-430

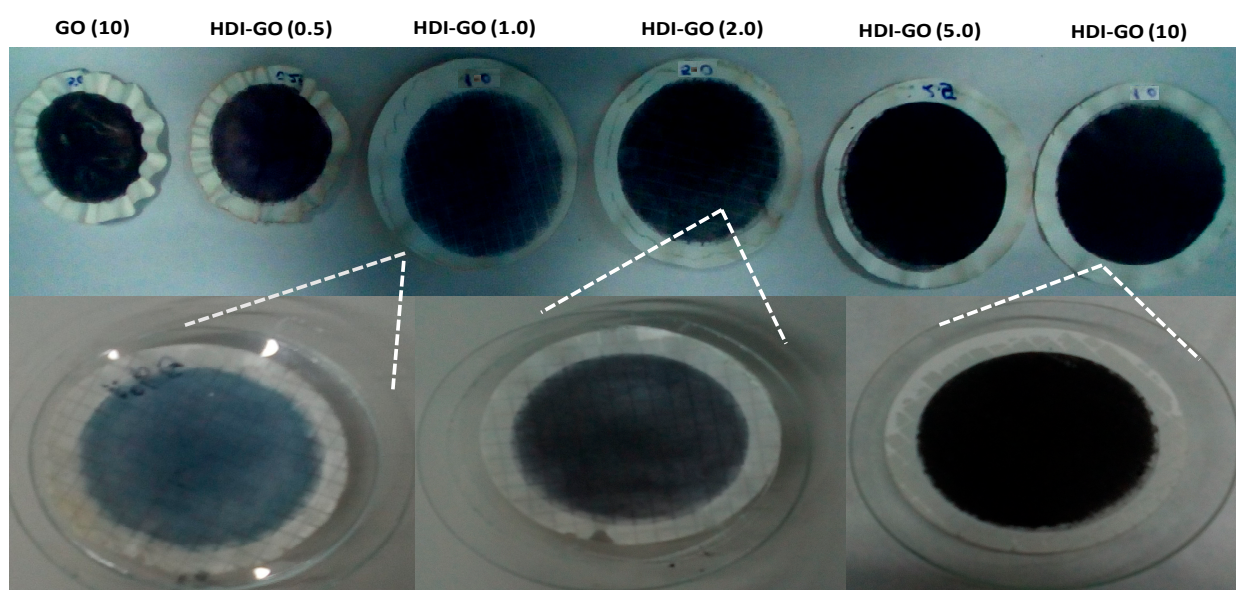

Figure S1. Photographs of PANI-based nanocomposites incorporating different GO or HDI-GO 6 contents.

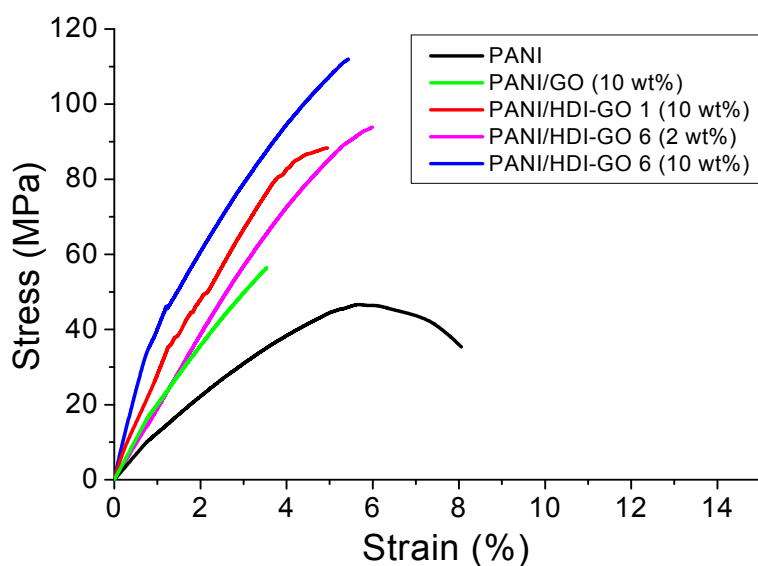

Figure S2. Stress-strain curves of PANI and some PANI-based nanocomposites.

**Table S1.** Data obtained from the Raman spectra and XRD patterns of PANI/HDI-GO nanocomposites.

| Sample                  | $\nu_{\text{C-N}}$<br>( $\text{cm}^{-1}$ ) | $\nu_{\text{C=N}}$<br>( $\text{cm}^{-1}$ ) | $\nu_{\text{C=C}}$<br>( $\text{cm}^{-1}$ ) | peak<br>( $2\theta$ ) <sup>a</sup> | $I_{\text{PANI}}/I_{\text{COM}}$ <sup>b</sup> | $d_{002}$ <sup>c</sup><br>(nm) |
|-------------------------|--------------------------------------------|--------------------------------------------|--------------------------------------------|------------------------------------|-----------------------------------------------|--------------------------------|
| PANI                    | 1191                                       | 1396                                       | 1597                                       | 25.31                              | -                                             | -                              |
| PANI/GO (10 wt%)        | 1201                                       | 1399                                       | 1605                                       | 25.13                              | 1.792                                         | 0.799                          |
| PANI/HDI-GO 1 (0.5 wt%) | 1195                                       | 1398                                       | 1600                                       | 25.22                              | 1.533                                         | 0.943                          |
| PANI/HDI-GO 1 (1.0 wt%) | 1197                                       | 1400                                       | 1603                                       | 25.16                              | 1.732                                         | 1.029                          |
| PANI/HDI-GO 1 (2.0 wt%) | 1203                                       | 1403                                       | 1605                                       | 25.08                              | 1.958                                         | 1.065                          |
| PANI/HDI-GO 1 (5.0 wt%) | 1207                                       | 1405                                       | 1609                                       | 25.02                              | 2.183                                         | 1.094                          |
| PANI/HDI-GO 1 (10 wt%)  | 1214                                       | 1407                                       | 1612                                       | 24.95                              | 2.325                                         | 1.183                          |
| PANI/HDI-GO 6 (0.5 wt%) | 1198                                       | 1401                                       | 1602                                       | 25.06                              | 2.109                                         | 1.041                          |
| PANI/HDI-GO 6 (1.0 wt%) | 1205                                       | 1404                                       | 1607                                       | 24.97                              | 2.343                                         | 1.097                          |
| PANI/HDI-GO 6 (2.0 wt%) | 1210                                       | 1408                                       | 1616                                       | 24.88                              | 2.446                                         | 1.186                          |
| PANI/HDI-GO 6 (5.0 wt%) | 1215                                       | 1411                                       | 1620                                       | 24.64                              | 2.796                                         | 1.240                          |
| PANI/HDI-GO 6 (10 wt%)  | 1218                                       | 1412                                       | 1623                                       | 24.52                              | 2.911                                         | 1.335                          |

$\nu_{\text{C-N}}$ : C–N stretching vibrations of benzenoid, quinonoid, and polaronic forms of PANI;  $\nu_{\text{C=N}}$ : C=N stretching vibrations in the quinonoid units;  $\nu_{\text{C=C}}$ : C=C stretching of the benzenoid ring. <sup>a</sup>position of the peak maximum of PANI; <sup>b</sup>ratio of the intensity between the peak maximum of PANI and that of the composite; <sup>c</sup>interlayer  $d$  spacing values of (002) peak of GO.

**Table S2.** TGA and zeta potential data of PANI/HDI-GO nanocomposites.

| <b>Sample</b>           | <b>T<sub>i</sub> (°C)</b> | <b>T<sub>10</sub> (°C)</b> | <b>T<sub>max(I,II)</sub> (°C)</b> | <b>R (wt%)</b> | <b>ζ (mV)</b> |
|-------------------------|---------------------------|----------------------------|-----------------------------------|----------------|---------------|
| PANI                    | 123                       | 193                        | 199, 422                          | 25.2           | +40.1         |
| GO                      | 117                       | 173                        | 227                               | 46.9           | -38.6         |
| HDI-GO 1                | 149                       | 230                        | 224,355                           | 51.0           | -23.7         |
| HDI-GO 6                | 188                       | 286                        | 253,376                           | 43.4           | -18.5         |
| PANI/GO (10 wt%)        | 135                       | 204                        | 229, 432                          | 23.4           | +34.6         |
| PANI/HDI-GO 1 (0.5 wt%) | 133                       | 203                        | 206, 430                          | 25.0           | +33.7         |
| PANI/HDI-GO 1 (1.0 wt%) | 146                       | 217                        | 217, 451                          | 26.1           | +28.9         |
| PANI/HDI-GO 1 (2.0 wt%) | 158                       | 235                        | 238, 574                          | 26.7           | +21.5         |
| PANI/HDI-GO 1 (5.0 wt%) | 166                       | 254                        | 244, 589                          | 27.0           | +17.6         |
| PANI/HDI-GO 1 (10 wt%)  | 176                       | 270                        | 266, 512                          | 25.5           | +12.4         |
| PANI/HDI-GO 6 (0.5 wt%) | 135                       | 207                        | 211, 434                          | 26.3           | +28.3         |
| PANI/HDI-GO 6 (1.0 wt%) | 148                       | 226                        | 233, 457                          | 27.8           | +23.9         |
| PANI/HDI-GO 6 (2.0 wt%) | 162                       | 245                        | 257, 482                          | 29.4           | +19.3         |
| PANI/HDI-GO 6 (5.0 wt%) | 179                       | 263                        | 365, 512                          | 30.9           | +15.2         |
| PANI/HDI-GO 6 (10 wt%)  | 187                       | 283                        | 280, 531                          | 32.2           | +9.7          |

T<sub>i</sub>: initial degradation temperature at 2% weight loss; T<sub>10</sub>: temperature of 10% of weight loss. T<sub>max</sub>: temperature of maximum rate of weight loss. The subscripts I and II refer to the first and second degradation stages, respectively. R: residue at 700 °C. ζ zeta potential at 25 °C.
